# Supplementary material
Source: Springer Nature journal article supplement (https://www.springermedizin.de/resource/supplementary/12885_2010_2631_MOESM8_ESM.pdf/9461592)

## a. Adhesion

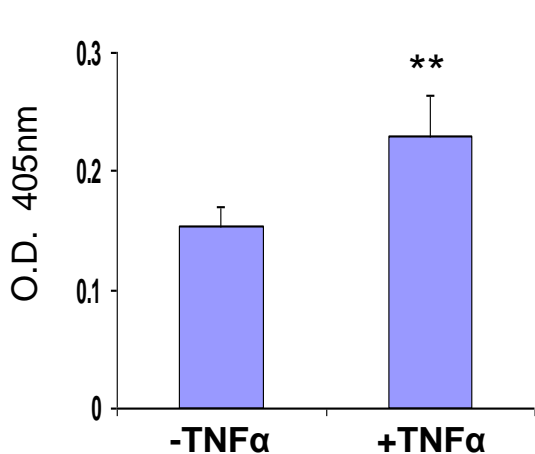

## b. Migration

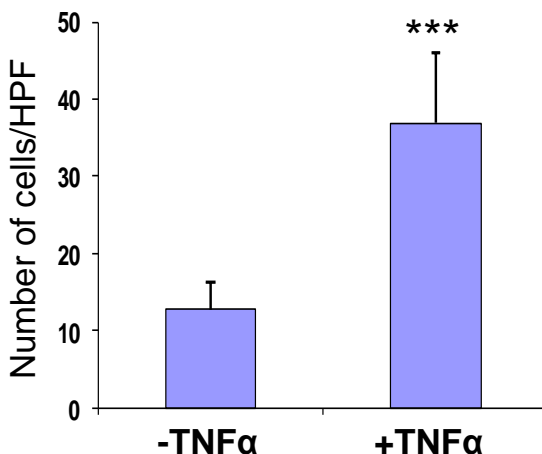

## c1. Invasion

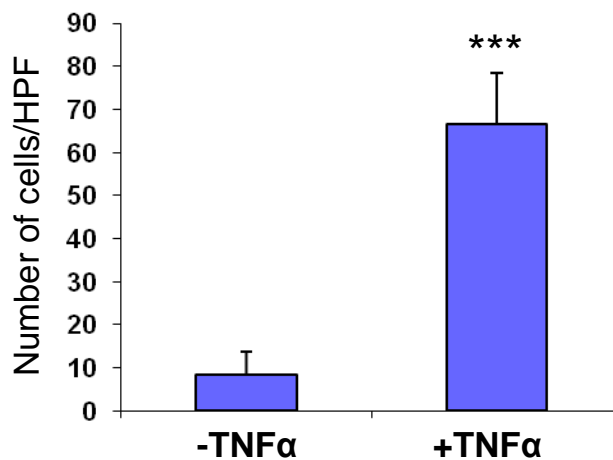

## c2a. Invasion w/o TNFα

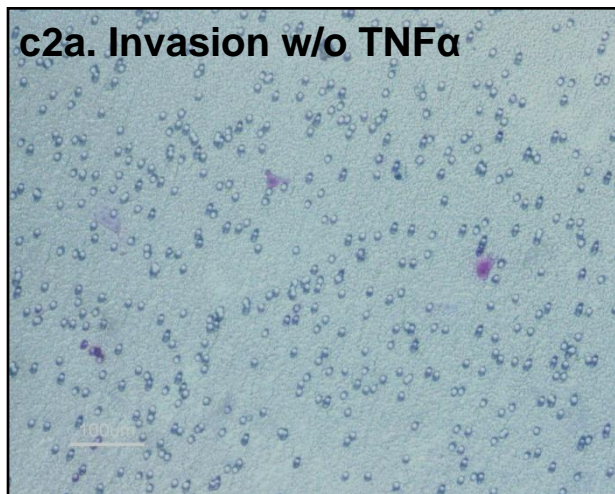

## c2b. Invasion + TNFα

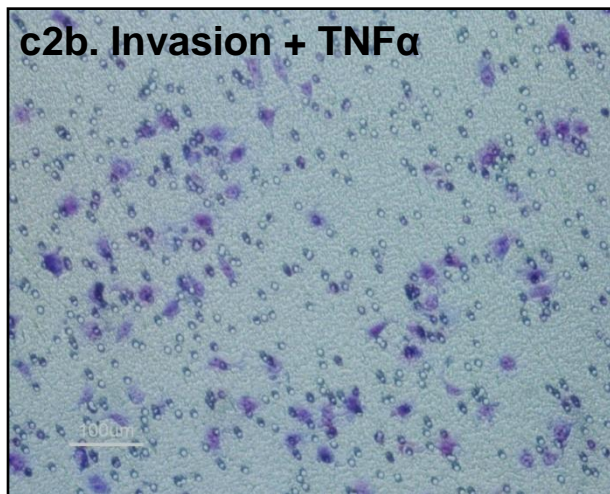

Supplement: MOESM8 [file 9461592]
